# Supplementary material for: Epicardial, pericardial and total cardiac fat and cardiovascular disease in type 2 diabetic patients with elevated urinary albumin excretion rate
Source: Oxford University Press journal article supplement (doi:10.1177/2047487317717820), 2017-06-26
Supplement: cpr717820_supplementary_material.pdf [file cpr717820_supplementary_material.pdf]

**Supplementary Table 1: Association of CAT (high/low) to markers of low-grade inflammation.**

| Adipose tissue       | Model | CAT split in high/low group |                |
|----------------------|-------|-----------------------------|----------------|
|                      |       | Coefficient (95% CI) (%)    | <i>p</i> value |
| hsCRP (mg/L)         | 1     | 9.6 (-24.8-59.6)            | 0.631          |
|                      | 2     | 10.9 (-23.0-59.5)           | 0.579          |
|                      | 3     | 8.9 (-22.1-52.3)            | 0.620          |
| TNF $\alpha$ (pg/mL) | 1     | -4.3 (-11.6-3.5)            | 0.269          |
|                      | 2     | -4.3 (-11.4-3.4)            | 0.264          |
|                      | 3     | -4.1 (-11.2-3.5)            | 0.284          |
| IL-1 $\beta$ (pg/mL) | 1     | 0.6 (-5.3-6.9)              | 0.839          |
|                      | 2     | 0.6 (-5.2-6.8)              | 0.845          |
|                      | 3     | 0.6 (-5.2-6.8)              | 0.840          |
| IL-6 (pg/mL)         | 1     | -1.7 (-14.4-12.4)           | 0.805          |
|                      | 2     | -2.1 (-14.4-12.0)           | 0.758          |
|                      | 3     | -2.7 (-14.8-11.0)           | 0.681          |
| IL-8 (pg/mL)         | 1     | 14.1 (0.6-29.5)             | <b>0.039</b>   |
|                      | 2     | 14.1 (0.8-29.2)             | <b>0.038</b>   |
|                      | 3     | 14.1 (0.8-29.2)             | <b>0.026</b>   |

Abbreviations: CAT, cardiac adipose tissue; hsCRP, high sensitive C reactive protein; TNF $\alpha$ , tumor necrosis factor  $\alpha$ ; IL-1 $\beta$ , interleukin 1  $\beta$ ; IL-6, interleukin 6; IL-8, interleukin 8. Markers of low-grade inflammation were log transformed. Back-transformed estimates are displayed to obtain % increase in inflammation levels from low CAT vs. high CAT groups.
